# Supplementary material
Source: HighWire-hosted journal article supplement (https://bmjopen.bmj.com/content/8/12/e022195)
Supplement: inline-supplementary-material-2 [file inline-supplementary-material-2.pdf]

## **Can seaweed supplementation reduce CVD risk?**

### **CONSENT FORM**

**All volunteers**

**NOTE:** This consent form will remain with the Monash University researcher for their records

**Project:** Can seaweed supplementation reduce CVD risk?

**Chief Investigator:** Dr Maxine Bonham

I have been asked to take part in the Monash University research project specified above. I have read and understood the Explanatory Statement, which I keep for my records, and I hereby consent to participate in this project.

|                                                                                                                                                         | Yes                      | No                       |
|---------------------------------------------------------------------------------------------------------------------------------------------------------|--------------------------|--------------------------|
| I agree to provide blood via a finger prick                                                                                                             | <input type="checkbox"/> | <input type="checkbox"/> |
| I agree to having my weight, height, body composition and blood pressure measured                                                                       | <input type="checkbox"/> | <input type="checkbox"/> |
| I agree to complete food and physical activity questionnaires and a questionnaire about intolerance symptoms                                            | <input type="checkbox"/> | <input type="checkbox"/> |
| I agree to consume a seaweed supplement or placebo daily for 12 weeks                                                                                   | <input type="checkbox"/> | <input type="checkbox"/> |
| I agree to providing venous blood samples                                                                                                               | <input type="checkbox"/> | <input type="checkbox"/> |
| I agree to participate in the cognitive part of this research and complete surveys and computerised tests in relation to my mood and cognitive function | <input type="checkbox"/> | <input type="checkbox"/> |
| I agree to be contacted for participation in future research                                                                                            | <input type="checkbox"/> | <input type="checkbox"/> |
| I agree for my blood samples to be used in future studies pending ethical approval                                                                      | <input type="checkbox"/> | <input type="checkbox"/> |

Name of Participant \_\_\_\_\_

Participant Signature \_\_\_\_\_ Date \_\_\_\_\_
